# Supplementary material for: CXCR4 in Tumor Epithelial Cells Mediates Desmoplastic Reaction in Pancreatic Ductal Adenocarcinoma
Source: Oxford University Press journal article supplement (doi:10.1158/0008-5472.can-19-2745), 2020-06-30
Supplement: 00085472can192745-sup-228351_3_supp_6371521_qc78rl.xlsx [file 00085472can192745-sup-228351_3_supp_6371521_qc78rl.xlsx]

## Sheet: tableS1
	table S1 : recombination detection primers and qPCR primers
	recombination detection primers
		forward	reverse
	Cxcr4flox/flox	5'-GCATATAACAAGTGACTGGT-3'	5'-ACCACAGGTTTATGAGCCTCAGGTC-3'
	KrasLSL-G12D/+	5'-GTCTTTCCCCACAGTGC-3'	5'-CTCTTGCCTACGCCAGCT-3'
	Trp53LSL-R172H/+	5'-GCCTTGCACCTTTCCAACTG-3'	5'-CTTGGAGACATAGCCACACTG-3'
	qPCR primers
		forward	reverse
	Epcam	5'-GAGTCCCTGTTCCATTCTT-3'	5'-TCTCCTTTATCTCAGCCTTC-3'
	Vimentin	5'-CGGCTGCGAGAGAAATTGC-3'	5'-CCACTTTCCGTTCAAGGTCAAG-3'
	Cxcr4	5'-CAGCATCGACTCCTTCATCC-3'	5'-GGTTCAGGCAACAGTGGAAG-3'
	Cxcl12	5'-CAGAGCCAACGTCAAGCA-3'	5'-AGGTACTCTTGGATCCAC-3'
	Gapdh	5'-AGGTCGGTGTGAACGGATTTG-3'	5'-TGTAGACCATGTAGTTGAGGTCA-3'

## Sheet: tableS2
	tableS2 : antibodies for immunohistochemistory and two chamber assay
	immunostainning
	antibody	maker	catalogue number	host	anti
	anti-CXCR4	abcam	ab124824	rabbit	human
	anti-AE1/AE3	abcam	ab9377	mouse	human
	anti-Vimentin	DAKO	M0725	mouse	human
	anti-αSMA	DAKO	M0851	mouse	human
	anti-Amylase	abcam	ab21156	rabbit	mouse
	anti-Insulin	DAKO	A0564	guinea pig	-
	two chamber invasion assay
	antibody	maker	catalogue number	host	anti
	anti-SDF1	abcam	ab9797	rabbit	mouse rat human

## Sheet: tableS3
	tableS3 : list of PDAC patients
	sex	age	TMN classification (UICC 8th)	stage	pathology
	female	66	T3N1M0	Ⅲ	moderately differentiated
	female	61	T1N0M0	Ⅰa	poorly differetiated
	male	51	T3N1M0	Ⅱb	moderately differentiated
	male	83	T3N1M1	Ⅳ	moderately differentiated
	male	72	T3N0M0	Ⅱa	well to moderately differentiated
	male	69	T3N1M0	Ⅱb	poorly differentiated
	male	74	T3N1M0	Ⅱb	well differentiated
	female	57	T2N0M0	Ⅰb	moderately differentiated
	male	70	T3N1M0	Ⅱb	well to moderately differentiated
	female	77	T3N1M0	Ⅱb	poorly differentiated
	female	69	T3N0M0	Ⅱa	well differentiated
	male	61	T2N0M0	Ⅰb	undifferentiated carcinoma with osteoclast-like giant cells
	male	67	T3N1M0	Ⅲ	undifferentiated carcinoma
	female	44	T3N1M0	Ⅲ	poorly differentiated
	male	66	T2N0M0	Ⅰb	undifferentiated carcinoma ( carcinosarcoma)
	female	73	T3N0M0	Ⅱa	undifferentiated carcinoma (carcinosarcoma)
	female	55	T3N1M0	Ⅱb	undifferentiated carcinoma (carcinosarcoma)
	male	50	T2N0M0	Ⅰb	undifferentiated carcinoma
	female	72	T3N0M0	Ⅱa	undifferentiated carcinoma with osteoclast-like giant cells
